# Supplementary material for: Cross-Cultural Adaptation and Psychometric Validation of the Constipation Assessment Scale among Chinese Adult Psychiatric Patients
Source: MDPI journal article supplement (doi:10.3390/ijerph20032703), 2023-02-02
Supplement: s1 [file s1]

### Supplementary Material S1 Confirmatory Factor Analysis Result

Table S1 Factor loading of each item of CAS-TC.

| Factor   | Items                                   | Non-standard | Standard load | z     | S.E.  | P        |
|----------|-----------------------------------------|--------------|---------------|-------|-------|----------|
|          |                                         | load factor  | factor        |       |       |          |
| Factor 1 | Rectal pain with bowel movement         | 1            | 0.772         | -     | -     | -        |
|          | Oozing liquid stool                     | 0.429        | 0.355         | 2.943 | 0.146 | 0.003*** |
|          | Urge but inability to pass stool        | 0.875        | 0.607         | 4.235 | 0.207 | 0.000*** |
|          | Less frequent bowel movements           | 0.733        | 0.523         | 3.957 | 0.185 | 0.000*** |
|          | Rectal fullness or pressure             | 0.42         | 0.309         | 2.608 | 0.161 | 0.009*** |
| Factor 2 | Abdominal distension or bloating        | 1            | 0.616         | -     | -     | -        |
|          | Small stool size                        | 1.033        | 0.728         | 3.754 | 0.275 | 0.000*** |
|          | Change in amount of gas passed rectally | 0.943        | 0.574         | 3.946 | 0.239 | 0.000*** |

Table S2 The AVE and CR of proposed two factors of CAS-TC

| Factor   | AVE   | CR    |
|----------|-------|-------|
| Factor 1 | 0.295 | 0.653 |
| Factor 2 | 0.402 | 0.668 |

Notes: AVE, Average Variance Extraction CR, Construct Reliability
